# Supplementary material
Source: HighWire-hosted journal article supplement (https://bmjopen.bmj.com/content/12/2/e050949)
Supplement: inline-supplementary-material-2 [file inline-supplementary-material-2.pdf]

**TableS1. Comparison of characteristics of the participants between satisfied group and dissatisfied group with each experience in switching process.**

| Characteristics            | The written information |                  |                |  | The verbal information |                  |                |  | The training for the new device |                  |                |  |                 |
|----------------------------|-------------------------|------------------|----------------|--|------------------------|------------------|----------------|--|---------------------------------|------------------|----------------|--|-----------------|
|                            | Satisfied               |                  | Dissatisfied   |  | Satisfied              |                  | Dissatisfied   |  | Satisfied                       |                  | Dissatisfied   |  |                 |
|                            | group<br>(N=394)        | group<br>(N=249) | <i>p value</i> |  | group<br>(N=362)       | group<br>(N=277) | <i>p value</i> |  | group<br>(N=364)                | group<br>(N=295) | <i>p value</i> |  |                 |
| <b>Gender, n (%)</b>       |                         |                  |                |  | 0.5201                 |                  |                |  | 0.3189                          |                  |                |  | <b>0.00458*</b> |
| Female                     | 258 (66)                | 170 (69)         |                |  | 235 (65)               | 192 (70)         |                |  | 235 (65)                        | 214 (74)         |                |  |                 |
| Male                       | 130 (33)                | 75 (30)          |                |  | 121 (34)               | 82 (30)          |                |  | 125 (34)                        | 74 (26)          |                |  |                 |
| Prefer not to say          | 4 (1)                   | 1 (0)            |                |  | 4 (1)                  | 1 (0)            |                |  | 3 (1)                           | 2 (1)            |                |  |                 |
| <b>Age, n (%)</b>          |                         |                  |                |  | 0.0546                 |                  |                |  | 0.0003*                         |                  |                |  | 0.1091          |
| 18-24                      | 28 (7)                  | 24 (10)          |                |  | 25 (7)                 | 27 (10)          |                |  | 26 (7)                          | 26 (9)           |                |  |                 |
| 25-34                      | 56 (14)                 | 52 (21)          |                |  | 51 (14)                | 61 (22)          |                |  | 57 (16)                         | 65 (22)          |                |  |                 |
| 35-44                      | 70 (18)                 | 50 (20)          |                |  | 55 (15)                | 59 (21)          |                |  | 71 (20)                         | 62 (21)          |                |  |                 |
| 45-54                      | 94 (24)                 | 58 (23)          |                |  | 85 (23)                | 66 (24)          |                |  | 74 (20)                         | 61 (21)          |                |  |                 |
| 55-64                      | 80 (20)                 | 40 (16)          |                |  | 78 (22)                | 38 (14)          |                |  | 77 (21)                         | 45 (15)          |                |  |                 |
| 65+                        | 61 (15)                 | 24 (10)          |                |  | 63 (17)                | 25 (9)           |                |  | 54 (15)                         | 35 (12)          |                |  |                 |
| Prefer not to say          | 5 (1)                   | 1 (0)            |                |  | 5 (1)                  | 1 (0)            |                |  | 5 (1)                           | 1 (0)            |                |  |                 |
| <b>Living areas, n (%)</b> |                         |                  |                |  | 0.3173                 |                  |                |  | 0.0267*                         |                  |                |  | 0.9099          |
| South East                 | 101 (26)                | 69 (28)          |                |  | 96 (27)                | 72 (26)          |                |  | 95 (26)                         | 80 (27)          |                |  |                 |
| South West                 | 75 (19)                 | 43 (17)          |                |  | 76 (21)                | 48 (17)          |                |  | 68 (19)                         | 60 (20)          |                |  |                 |
| North East and Yorkshire   | 52 (13)                 | 27 (11)          |                |  | 53 (15)                | 28 (10)          |                |  | 49 (13)                         | 34 (12)          |                |  |                 |
| Midlands                   | 42 (11)                 | 41 (16)          |                |  | 31 (9)                 | 51 (18)          |                |  | 46 (13)                         | 33 (11)          |                |  |                 |
| East of England            | 46 (12)                 | 17 (7)           |                |  | 37 (10)                | 28 (10)          |                |  | 39 (11)                         | 28 (9)           |                |  |                 |
| North West                 | 31 (8)                  | 17 (7)           |                |  | 26 (7)                 | 18 (7)           |                |  | 28 (8)                          | 19 (6)           |                |  |                 |
| London                     | 22 (6)                  | 20 (8)           |                |  | 19 (5)                 | 22 (8)           |                |  | 21 (6)                          | 24 (8)           |                |  |                 |
| Scotland                   | 16 (4)                  | 6 (2)            |                |  | 14 (4)                 | 4 (1)            |                |  | 8 (2)                           | 11 (4)           |                |  |                 |
| Wales                      | 6 (2)                   | 6 (2)            |                |  | 7 (2)                  | 4 (1)            |                |  | 6 (2)                           | 4 (1)            |                |  |                 |

|                                                     |     |      |     |      |                |     |      |     |                |     |      |                |      |
|-----------------------------------------------------|-----|------|-----|------|----------------|-----|------|-----|----------------|-----|------|----------------|------|
| Northern Ireland                                    | 1   | (0)  | 1   | (0)  | 1              | (0) | 1    | (0) | 2              | (1) | 1    | (0)            |      |
| Channel Islands                                     | 1   | (0)  | 1   | (0)  | 1              | (0) | 0    | (0) | 1              | (0) | 0    | (0)            |      |
| Isle of Wight                                       | 1   | (0)  | 1   | (0)  | 1              | (0) | 1    | (0) | 1              | (0) | 1    | (0)            |      |
| <b>Medical conditions, n (%)</b>                    |     |      |     |      | <b>0.2988</b>  |     |      |     | <b>0.0587</b>  |     |      | <b>0.1358</b>  |      |
| CD                                                  | 144 | (37) | 74  | (30) |                | 122 | (34) | 93  | (34)           | 125 | (35) | 104            | (35) |
| RA/JIA                                              | 104 | (27) | 64  | (26) |                | 106 | (29) | 54  | (19)           | 94  | (26) | 69             | (23) |
| AS                                                  | 79  | (20) | 53  | (21) |                | 70  | (19) | 60  | (22)           | 82  | (23) | 49             | (17) |
| PsA                                                 | 22  | (6)  | 24  | (10) |                | 23  | (6)  | 30  | (11)           | 22  | (6)  | 30             | (10) |
| UC                                                  | 25  | (6)  | 19  | (8)  |                | 23  | (6)  | 26  | (9)            | 21  | (6)  | 24             | (8)  |
| Psoriasis                                           | 15  | (4)  | 11  | (4)  |                | 13  | (4)  | 11  | (4)            | 14  | (4)  | 12             | (4)  |
| Others                                              | 3   | (1)  | 4   | (2)  |                | 4   | (1)  | 3   | (1)            | 4   | (1)  | 7              | (2)  |
| <b>Period of Humira use before switching, n (%)</b> |     |      |     |      | <b>0.1228</b>  |     |      |     | <b>0.0095*</b> |     |      | <b>0.3304</b>  |      |
| 3 months or less                                    | 14  | (4)  | 14  | (6)  |                | 12  | (3)  | 11  | (4)            | 14  | (4)  | 16             | (5)  |
| More than 3 months to 1 year                        | 66  | (17) | 51  | (20) |                | 60  | (17) | 53  | (19)           | 61  | (17) | 58             | (20) |
| More than 1 year to 5 years                         | 208 | (53) | 130 | (52) |                | 177 | (49) | 159 | (57)           | 188 | (52) | 152            | (52) |
| More than 5 years to 10 years                       | 68  | (17) | 42  | (17) |                | 72  | (20) | 41  | (15)           | 68  | (19) | 53             | (18) |
| More than 10 years                                  | 38  | (10) | 12  | (5)  |                | 41  | (11) | 13  | (5)            | 33  | (9)  | 16             | (5)  |
| <b>Self-reported disease activity, n (%)</b>        |     |      |     |      | <b>0.0282*</b> |     |      |     | <b>0.041*</b>  |     |      | <b>0.0358*</b> |      |
| Very well controlled                                | 243 | (62) | 157 | (63) |                | 229 | (63) | 174 | (63)           | 226 | (62) | 190            | (65) |
| controlled well                                     | 104 | (26) | 64  | (26) |                | 99  | (27) | 69  | (25)           | 84  | (23) | 80             | (27) |
| Neither                                             | 40  | (10) | 21  | (8)  |                | 26  | (7)  | 25  | (9)            | 42  | (12) | 18             | (6)  |
| Not controlled                                      | 1   | (0)  | 6   | (2)  |                | 2   | (1)  | 7   | (3)            | 4   | (1)  | 5              | (2)  |
| Not controlled well at all                          | 6   | (2)  | 0   | (0)  |                | 6   | (2)  | 0   | (0)            | 7   | (2)  | 1              | (0)  |

| No. of injections of the new biosimilar before survey, n (%) | 0.3279 |      |    |      | 0.4633 |      |    |      | 0.1015 |      |    |      |
|--------------------------------------------------------------|--------|------|----|------|--------|------|----|------|--------|------|----|------|
| 1                                                            | 35     | (9)  | 27 | (11) | 32     | (9)  | 29 | (11) | 37     | (10) | 31 | (11) |
| 2                                                            | 54     | (14) | 26 | (11) | 43     | (12) | 31 | (11) | 51     | (14) | 25 | (9)  |
| 3                                                            | 55     | (14) | 25 | (10) | 49     | (14) | 28 | (10) | 48     | (13) | 31 | (11) |
| 4                                                            | 37     | (9)  | 31 | (13) | 40     | (11) | 29 | (11) | 40     | (11) | 35 | (12) |
| 5                                                            | 25     | (6)  | 26 | (11) | 22     | (6)  | 21 | (8)  | 16     | (4)  | 30 | (10) |
| 6                                                            | 60     | (15) | 30 | (12) | 52     | (14) | 46 | (17) | 50     | (14) | 46 | (16) |
| 7                                                            | 18     | (5)  | 12 | (5)  | 15     | (4)  | 13 | (5)  | 13     | (4)  | 11 | (4)  |
| 8                                                            | 33     | (8)  | 22 | (9)  | 22     | (6)  | 27 | (10) | 26     | (7)  | 27 | (9)  |
| 9                                                            | 10     | (3)  | 8  | (3)  | 12     | (3)  | 9  | (3)  | 9      | (2)  | 8  | (3)  |
| 10                                                           | 13     | (3)  | 12 | (5)  | 18     | (5)  | 12 | (4)  | 19     | (5)  | 11 | (4)  |
| More than 10                                                 | 52     | (13) | 27 | (11) | 55     | (15) | 27 | (10) | 53     | (15) | 36 | (12) |

**CD, Crohn's Disease, RA, Rheumatoid arthritis, JIA, Juvenile Idiopathic Arthritis, AS, Axial spondyloarthritis including ankylosing spondylitis, PsA, Psoriatic arthritis, UC, Ulcerative colitis, Valuables presented as n (%), P values were assigned based on the chi-square test for categorical value when it's expected value is higher than 10 and Fisher's exact test was conducted if the expected values of categorical values were smaller than 10. \*P values less than 0.05 was considered statistically significant.**

Table S2a

Comparison of proportion of patients with "worse perception" or "better perception" on the new biosimilars between those expressing satisfaction and dissatisfaction in the switching process

|                            |                          | The written information |         |              |        |         |        |         |        | *unadjusted OR (95%CI) | *p value |
|----------------------------|--------------------------|-------------------------|---------|--------------|--------|---------|--------|---------|--------|------------------------|----------|
|                            |                          | satisfied               |         | dissatisfied |        | Neither |        | N/A     |        |                        |          |
|                            |                          | group                   | group   | group        | group  | group   | group  | group   | group  |                        |          |
|                            |                          | (N=394)                 | (N=249) | (N=238)      | (N=13) | (N=238) | (N=13) | (N=238) | (N=13) |                        |          |
| Side effects               | worse perception, n (%)  | 118                     | (30)    | 158          | (63)   | 117     | (49)   | 7       | (54)   | 0.15 (0.06-0.40)       | <.0001†  |
|                            | better perception, n (%) | 25                      | (6)     | 5            | (2)    | 6       | (3)    | 1       | (8)    |                        |          |
|                            | the same, n (%)          | 218                     | (56)    | 58           | (23)   | 101     | (42)   | 1       | (8)    |                        |          |
|                            | N/A, n (%)               | 31                      | (8)     | 28           | (11)   | 14      | (6)    | 4       | (31)   |                        |          |
| injecting Pain when        | worse perception, n (%)  | 275                     | (70)    | 194          | (78)   | 183     | (77)   | 9       | (69)   | 0.90 (0.45-1.81)       | 0.861    |
|                            | better perception, n (%) | 22                      | (6)     | 14           | (6)    | 6       | (3)    | 0       | (0)    |                        |          |
|                            | the same, n (%)          | 87                      | (22)    | 31           | (13)   | 46      | (19)   | 1       | (8)    |                        |          |
|                            | N/A, n (%)               | 8                       | (2)     | 9            | (4)    | 3       | (1)    | 3       | (23)   |                        |          |
| injection device using the | worse perception, n (%)  | 159                     | (40)    | 153          | (62)   | 118     | (50)   | 5       | (38)   | 0.35 (0.21-0.58)       | <.0001†  |
|                            | better perception, n (%) | 77                      | (20)    | 26           | (10)   | 35      | (15)   | 2       | (15)   |                        |          |
|                            | the same, n (%)          | 146                     | (37)    | 64           | (26)   | 81      | (34)   | 3       | (23)   |                        |          |
|                            | N/A, n (%)               | 11                      | (3)     | 5            | (2)    | 3       | (1)    | 3       | (23)   |                        |          |
| symptoms Managing          | worse perception, n (%)  | 112                     | (28)    | 172          | (69.1) | 123     | (52)   | 5       | (38)   | 0.11 (0.02-0.49)       | 0.0011†  |
|                            | better perception, n (%) | 12                      | (3)     | 2            | (0.8)  | 4       | (2)    | 0       | (0)    |                        |          |
|                            | the same, n (%)          | 254                     | (64)    | 57           | (22.9) | 103     | (44)   | 5       | (38)   |                        |          |
|                            | N/A, n (%)               | 16                      | (4)     | 18           | (7.23) | 6       | (3)    | 3       | (23)   |                        |          |

Valuables presented as n (%). \*Comparison of frequency of responses with "worse perception" and "better perception" of the new biosimilar compared to originator between

"satisfied group" and "dissatisfied group" with the experiences in the switching process to biosimilar were expressed as unadjusted odds ratios (OR), 95% confidential intervals

(95%CI) and p values. Responses expressing "3 (neither)" or "not applicable (N/A)" in terms of satisfaction with the services in switching process and "the same" or "N/A" in terms of

the perception of the new biosimilar were excluded from the analysis. P values were assigned based on the chi-square test for categorical value when it's expected value is higher than 10 and Fisher's exact test was conducted if the expected values of categorical values were smaller than 10. †P values less than 0.05 was considered statistically significant.

**Table S2b** Comparison of proportion of patients with "worse perception" or "better perception" on the new biosimilars between those expressing satisfaction and dissatisfaction in the switching process

|                                        |                          | The verbal information |      |                    |      |         |      |        |      | *unadjusted OR (95%CI)  | *p value          |
|----------------------------------------|--------------------------|------------------------|------|--------------------|------|---------|------|--------|------|-------------------------|-------------------|
|                                        |                          | Satisfied group        |      | Dissatisfied group |      | Neither |      | N/A    |      |                         |                   |
|                                        |                          | (N=362)                |      | (N=277)            |      | (N=175) |      | (N=79) |      |                         |                   |
| Side effects                           | Worse perception, n (%)  | 117                    | (33) | 164                | (59) | 83      | (47) | 34     | (43) | <b>0.15 (0.06-0.40)</b> | <b>&lt;.0001†</b> |
|                                        | Better perception, n (%) | 24                     | (7)  | 5                  | (2)  | 5       | (3)  | 3      | (4)  |                         |                   |
|                                        | The same, n (%)          | 192                    | (53) | 79                 | (29) | 76      | (43) | 31     | (39) |                         |                   |
|                                        | N/A, n (%)               | 27                     | (8)  | 29                 | (10) | 11      | (6)  | 11     | (14) |                         |                   |
| Pain when injecting                    | Worse perception, n (%)  | 258                    | (71) | 225                | (82) | 125     | (72) | 52     | (66) | 0.67 (0.30-1.50)        | 0.428             |
|                                        | Better perception, n (%) | 17                     | (5)  | 10                 | (4)  | 13      | (7)  | 3      | (4)  |                         |                   |
|                                        | The same, n (%)          | 76                     | (21) | 34                 | (12) | 34      | (20) | 20     | (25) |                         |                   |
|                                        | N/A, n (%)               | 10                     | (3)  | 7                  | (3)  | 2       | (1)  | 4      | (5)  |                         |                   |
| The ease of using the injection device | Worse perception, n (%)  | 153                    | (42) | 166                | (60) | 84      | (48) | 32     | (41) | <b>0.45 (0.28-0.72)</b> | <b>0.0008†</b>    |
|                                        | Better perception, n (%) | 66                     | (18) | 32                 | (12) | 26      | (15) | 16     | (20) |                         |                   |
|                                        | The same, n (%)          | 130                    | (36) | 73                 | (27) | 63      | (36) | 27     | (34) |                         |                   |
|                                        | N/A, n (%)               | 12                     | (3)  | 4                  | (1)  | 2       | (1)  | 4      | (5)  |                         |                   |
| Managing symptoms                      | Worse perception, n (%)  | 117                    | (32) | 175                | (63) | 89      | (51) | 32     | (41) | <b>0.20 (0.05-0.74)</b> | <b>0.0177†</b>    |
|                                        | Better perception, n (%) | 10                     | (3)  | 3                  | (1)  | (3)     | (2)  | 2      | (3)  |                         |                   |
|                                        | The same, n (%)          | 221                    | (61) | 76                 | (27) | (75)    | (43) | 45     | (57) |                         |                   |
|                                        | N/A, n (%)               | 13                     | (4)  | 23                 | (8)  | (7)     | (4)  | 0      | (0)  |                         |                   |

Valuables presented as n (%). \*Comparison of frequency of responses with "worse perception" and "better perception" of the new biosimilar compared to originator between "satisfied group" and "dissatisfied group" with the experiences in the switching process to biosimilar were expressed as unadjusted odds ratios (OR), 95% confidential intervals (95%CI) and p values. Responses expressing "3 (neither)" or "not applicable (N/A)" in terms of satisfaction with the services in switching process and "the same" or "N/A" in terms of the perception of the new biosimilar were excluded from the analysis. P values were assigned based on the chi-square test for categorical value when it's expected value is higher than 10 and Fisher's exact test was conducted if the expected values of categorical values were smaller than 10. †P values less than 0.05 was considered statistically significant.

**Table S2c**

**Comparison of proportion of patients with "worse perception" or "better perception" on the new biosimilars between those expressing satisfaction and dissatisfaction in the switching process**

|                  |                          | The training |      |              |      |         |      |        |      |                         |                   |
|------------------|--------------------------|--------------|------|--------------|------|---------|------|--------|------|-------------------------|-------------------|
|                  |                          | satisfied    |      | dissatisfied |      | Neither |      | N/A    |      | *unadjusted OR (95%CI)  | *p value          |
|                  |                          | group        |      | group        |      | (N=149) |      | (N=86) |      |                         |                   |
|                  |                          | (N=364)      |      | (N=295)      |      |         |      |        |      |                         |                   |
| Side effects     | worse perception, n (%)  | 133          | (37) | 176          | (60) | 65      | (44) | 25     | (29) | <b>0.15 (0.06-0.41)</b> | <b>&lt;.0001†</b> |
|                  | better perception, n (%) | 25           | (7)  | 5            | (2)  | 4       | (3)  | 3      | (4)  |                         |                   |
|                  | the same, n (%)          | 176          | (48) | 90           | (31) | 65      | (44) | 47     | (55) |                         |                   |
|                  | N/A, n (%)               | 29           | (8)  | 24           | (8)  | 15      | (10) | 10     | (12) |                         |                   |
| injecting        | worse perception, n (%)  | 254          | (70) | 242          | (83) | 113     | (76) | 52     | (60) | <b>0.19 (0.07-0.49)</b> | <b>0.0001†</b>    |
|                  | better perception, n (%) | 28           | (8)  | 5            | (2)  | 8       | (5)  | 2      | (2)  |                         |                   |
|                  | the same, n (%)          | 75           | (21) | 38           | (13) | 27      | (18) | 24     | (28) |                         |                   |
|                  | N/A, n (%)               | 6            | (2)  | 8            | (3)  | 1       | (1)  | 8      | (9)  |                         |                   |
| injection device | worse perception, n (%)  | 134          | (37) | 194          | (66) | 76      | (51) | 32     | (37) | <b>0.24 (0.15-0.40)</b> | <b>&lt;.0001†</b> |
|                  | better perception, n (%) | 79           | (22) | 28           | (10) | 20      | (14) | 13     | (15) |                         |                   |
|                  | the same, n (%)          | 144          | (40) | 66           | (22) | 51      | (34) | 32     | (37) |                         |                   |
|                  | N/A, n (%)               | 6            | (2)  | 6            | (2)  | 1       | (1)  | 9      | (10) |                         |                   |
| symptoms         | worse perception, n (%)  | 136          | (37) | 178          | (60) | 67      | (45) | 33     | (38) | 0.38 (0.11-1.30)        | 0.1412            |
|                  | better perception, n (%) | 8            | (2)  | 4            | (1)  | 4       | (3)  | 2      | (2)  |                         |                   |
|                  | the same, n (%)          | 201          | (55) | 97           | (33) | 73      | (49) | 46     | (53) |                         |                   |
|                  | N/A, n (%)               | 18           | (5)  | 16           | (5)  | 4       | (3)  | 5      | (6)  |                         |                   |

Valuables presented as n (%). \*Comparison of frequency of responses with "worse perception" and "better perception" of the new biosimilar compared to originator between "satisfied group" and "dissatisfied group" with the experiences in the switching process to biosimilar were expressed as unadjusted odds ratios (OR), 95% confidential intervals (95%CI) and p values. Responses expressing "3 (neither)" or "not applicable (N/A)" in terms of satisfaction with the services in switching process and "the same" or "N/A" in terms of the perception of the new biosimilar were excluded from the analysis. P values were assigned based on the chi-square test for categorical value when it's expected value is higher than 10 and Fisher's exact test was conducted if the expected values of categorical values were smaller than 10. †P values less than 0.05 was considered statistically significant.
